# Supplementary material for: Pulsed Electric Fields (PEF) and Accelerated Solvent Extraction (ASE) for Valorization of Red (Aristeus antennatus) and Camarote (Melicertus kerathurus) Shrimp Side Streams: Antioxidant and HPLC Evaluation of the Carotenoid Astaxanthin Recovery
Source: MDPI journal article supplement (doi:10.3390/antiox12020406), 2023-02-07
Supplement: s1 [file s1]

Table S1. Astaxanthin recovery from shrimp side streams after accelerated solvent extraction (ASE) using different temperatures and solvents.

| Shrimp Specie        | Solvent | Temp. (°C) | Pressure (bar) | Time (min) | ASX (µg/g dw)               | TEAC (µmol TE/g dw)          |
|----------------------|---------|------------|----------------|------------|-----------------------------|------------------------------|
| <i>M. kerathurus</i> | Ethanol | 40         | 103.42         | 15         | 94.81 ± 1.73 <sup>a</sup>   | 543.33 ± 14.88 <sup>ab</sup> |
|                      |         | 50         |                |            | 121.98 ± 1.53 <sup>b</sup>  | 582.11 ± 22.40 <sup>b</sup>  |
|                      |         | 60         |                |            | 126.09 ± 4.78 <sup>b</sup>  | 521.37 ± 17.12 <sup>a</sup>  |
|                      | DMSO    | 40         |                |            | 139.56 ± 1.61 <sup>a</sup>  | 614.61 ± 33.35 <sup>a</sup>  |
|                      |         | 50         |                |            | 172.99 ± 8.42 <sup>b</sup>  | 779.99 ± 36.23 <sup>c</sup>  |
|                      |         | 60         |                |            | 168.44 ± 2.55 <sup>b</sup>  | 697.93 ± 16.33 <sup>b</sup>  |
| <i>A. antennatus</i> | Ethanol | 40         |                |            | 239.40 ± 4.09 <sup>a</sup>  | 651.40 ± 35.25 <sup>b</sup>  |
|                      |         | 50         |                |            | 364.22 ± 6.38 <sup>b</sup>  | 711.52 ± 19.41 <sup>c</sup>  |
|                      |         | 60         |                |            | 365.14 ± 7.96 <sup>b</sup>  | 664.52 ± 25.37 <sup>a</sup>  |
|                      | DMSO    | 40         |                |            | 286.65 ± 3.06 <sup>a</sup>  | 608.74 ± 18.45 <sup>b</sup>  |
|                      |         | 50         |                |            | 389.73 ± 2.43 <sup>c</sup>  | 581.20 ± 13.73 <sup>b</sup>  |
|                      |         | 60         |                |            | 357.70 ± 11.47 <sup>b</sup> | 489.98 ± 13.19 <sup>a</sup>  |

Different letters in superscript by column indicate statistically significant differences in the concentration of astaxanthin (ASX) and antioxidant capacity (TEAC) between extraction conditions for each type of shrimp ( $p < 0.05$ ).
